# Supplementary material for: Effects of a 1 year development programme for recently graduated veterinary professionals on personal and job resources: a combined quantitative and qualitative approach
Source: PubMed Central journal article supplement (PMC4697329; doi:10.1186/s12917-015-0627-y), 2015-12-30
Supplement: 12917_2015_627_MOESM1_ESM.pdf [file 12917_2015_627_MOESM1_ESM.pdf]

Consolidated criteria for reporting qualitative research (COREQ): a 32-item checklist for interviews and focus groups

| No                                             | Item                                     | Guide questions/description                                                                                                                                                                                                      |                                                                                                                          |
|------------------------------------------------|------------------------------------------|----------------------------------------------------------------------------------------------------------------------------------------------------------------------------------------------------------------------------------|--------------------------------------------------------------------------------------------------------------------------|
| <b>Domain 1: Research team and reflexivity</b> |                                          |                                                                                                                                                                                                                                  |                                                                                                                          |
| <b>Personal Characteristics</b>                |                                          |                                                                                                                                                                                                                                  |                                                                                                                          |
| 1                                              | Interviewer/facilitator                  | Which author/s conducted the interview or focus groups                                                                                                                                                                           | First author NM                                                                                                          |
| 2                                              | Credentials                              | What were the researcher's credentials?                                                                                                                                                                                          | DVM, MSc                                                                                                                 |
| 3                                              | Occupation                               | What was their occupation at the time of the study?                                                                                                                                                                              | Researcher/ course coordinator                                                                                           |
| 4                                              | Gender                                   | Was the researcher male or female?                                                                                                                                                                                               | Female                                                                                                                   |
| 5                                              | Experience and training                  | What experience or training did the researcher have?                                                                                                                                                                             | First author has done previous qualitative research projects and has done MSc in psychology                              |
| <b>Relationship with participants</b>          |                                          |                                                                                                                                                                                                                                  |                                                                                                                          |
| 6                                              | Relationship established                 | Was a relationship established prior to study commencement?                                                                                                                                                                      | Former relationship was present with one participant, but otherwise relationship was not established prior to interviews |
| 7                                              | Participant knowledge of the interviewer | What did the participants know about the researcher? e.g. personal goals, reasons for doing the research<br>Personal interest in research and reasons for doing it were described prior to the interviews.                       | They knew nothing about personal interest                                                                                |
| 8                                              | Interviewer characteristics              | What characteristics were reported about the interviewer/facilitator?<br>e.g. Bias, assumptions, reasons and interests in the research topic<br>Descriptions of interviewers experience of illness, types of work and approaches | Participants knew that interviewer had been working as a veterinary practitioner.                                        |

|                                   |                                       |                                                                                                                                     |                                                                                                                                                                                                                   |
|-----------------------------------|---------------------------------------|-------------------------------------------------------------------------------------------------------------------------------------|-------------------------------------------------------------------------------------------------------------------------------------------------------------------------------------------------------------------|
|                                   |                                       | including references to publicly available written work.                                                                            |                                                                                                                                                                                                                   |
| <b>Domain 2:<br/>study design</b> |                                       |                                                                                                                                     |                                                                                                                                                                                                                   |
| <b>Theoretical framework</b>      |                                       |                                                                                                                                     |                                                                                                                                                                                                                   |
| <b>9</b>                          | Methodological orientation and Theory | What methodological orientation was stated to underpin the study?                                                                   | Transcriptions were analysed by use of deductive thematic analysis                                                                                                                                                |
| <b>Participant selection</b>      |                                       |                                                                                                                                     |                                                                                                                                                                                                                   |
| <b>10</b>                         | Sampling                              | How were participants selected? e.g. purposive, convenience, consecutive, snowball<br>Purposive and snowball                        | Participants were randomly chosen out of the participants who completed the first questionnaire in the quantitative part of the study. Randomly means that we approached every second or third person on the list |
| <b>11</b>                         | Method of approach                    | How were participants approached?                                                                                                   | By telephone                                                                                                                                                                                                      |
| <b>12</b>                         | Sample size                           | How many participants were in the study?                                                                                            | 16                                                                                                                                                                                                                |
| <b>13</b>                         | Non-participation                     | How many people refused to participate or dropped out?                                                                              | No one has dropped out                                                                                                                                                                                            |
| <b>Setting</b>                    |                                       |                                                                                                                                     |                                                                                                                                                                                                                   |
| <b>14</b>                         | Setting of data collection            | Where was the data collected? e.g. home, clinic, workplace<br>In a place selected by participants. All above options were included. | Most data were collected at participant's home. Two participants visited the workplace of the interviewer<br>Two participants were interviewed at their own workplace                                             |
| <b>15</b>                         | Presence of non-participants          | Was anyone else present besides the participants and researchers?                                                                   | No                                                                                                                                                                                                                |
| <b>16</b>                         | Description of sample                 | What are the important characteristics of the Sample?                                                                               | <ul style="list-style-type: none"> <li>• 14 female/2 male</li> <li>• Age 24-33</li> <li>• Year of graduation: 2004 - 2009</li> <li>• 14 P working in veterinary practice, 2 P working elsewhere</li> </ul>        |
| <b>Data collection</b>            |                                       |                                                                                                                                     |                                                                                                                                                                                                                   |

|                                        |                                |                                                                                                                           |                                                                                        |
|----------------------------------------|--------------------------------|---------------------------------------------------------------------------------------------------------------------------|----------------------------------------------------------------------------------------|
| 17                                     | Interview guide                | Were questions, prompts, guides provided by the authors? Was it pilot tested?                                             | There was no pilot testing. Interview approach is described in the methods section     |
| 18                                     | Repeat interviews              | Were repeat interviews carried out?                                                                                       | No                                                                                     |
| 19                                     | Audio/visual recording         | Did the research use audio or visual recording to collect the data?                                                       | Data was audio recorded.                                                               |
| 20                                     | Field notes                    | Were field notes made during and/or after the interview or focus group?                                                   | Yes                                                                                    |
| 21                                     | Duration                       | What was the duration of the interviews or focus group?<br>Variable. From 50 minutes to 2 interviews of up to 90 minutes. | Approximately one hour                                                                 |
| 22                                     | Data saturation                | Was data saturation discussed?                                                                                            | No                                                                                     |
| 23                                     | Transcript returned            | Were transcripts returned to participants for comment and/or correction?                                                  | No                                                                                     |
| <b>Domain 3: analysis and findings</b> |                                |                                                                                                                           |                                                                                        |
| <b>Data analysis</b>                   |                                |                                                                                                                           |                                                                                        |
| 24                                     | Number of data coders          | How many data coders coded the data?                                                                                      | Two                                                                                    |
| 25                                     | Description of the coding tree | Did authors provide a description of the coding tree?                                                                     | The approach of the data is driven by theory. Coding is described in the manuscript    |
| 26                                     | Derivation of themes           | Were themes identified in advance or derived from the data?                                                               | Categories were identified in advance. Themes were identified after coding of the data |
| 27                                     | Software                       | What software, if applicable, was used to manage the data?                                                                | No software was used                                                                   |
| 28                                     | Participant checking           | Did participants provide feedback on the findings?                                                                        | No                                                                                     |
| <b>Reporting</b>                       |                                |                                                                                                                           |                                                                                        |
| 29                                     | Quotations presented           | Were participant                                                                                                          | Yes                                                                                    |

|           |                              |                                                                                             |     |
|-----------|------------------------------|---------------------------------------------------------------------------------------------|-----|
|           |                              | quotations presented to illustrate the themes / findings?<br>Was each quotation identified? | Yes |
| <b>30</b> | Data and findings consistent | Was there consistency between the data presented and the findings?                          | Yes |
| <b>31</b> | Clarity of major themes      | Were major themes clearly presented in the findings?                                        | Yes |
| <b>32</b> | Clarity of minor themes      | Is there a description of diverse cases or discussion of minor themes?                      | No  |
